# Supplementary material for: Regulating pore structures of carbon supports toward efficient selective hydrogenation of o-chloronitrobenzene on Pt nanoparticles
Source: Royal Society of Chemistry journal article supplement (doi:10.1039/d3nj01582c), 2023-01-01
Supplement: d3nj01582c1.pdf [file d3nj01582c1.pdf]

1 **Supporting Information**

2 **Regulating pore structures of carbon supports toward efficient selective**  
3 **hydrogenation of o-chloronitrobenzene on Pt nanoparticles**

4

5 **Yunpeng Lv<sup>a,1</sup>, Fang Yu<sup>a,1</sup>, Zhipeng Wang<sup>a,\*</sup>, Haiwei Liu<sup>a</sup>, Liyan Wang<sup>a</sup>, Jian Song<sup>a,\*</sup>, Yu**  
6 **Li<sup>a</sup>, Guiqiu Huang<sup>b,\*</sup>, Jian Cui<sup>c</sup>**

7

8 *<sup>a</sup>National Demonstration Center for Experimental Comprehensive Chemical Engineering*  
9 *Education, Institute of Green Catalysis, College of Chemistry and Chemical Engineering,*  
10 *North University of China, Taiyuan 030051, China*

11 *<sup>b</sup>School of Petroleum and Chemical Engineering, Guangxi Key Laboratory of Green Chemical*  
12 *Materials and Safety Technology, Beibu Gulf University, Qinzhou, 535011, China*

13 *<sup>c</sup>China North Energy Conservation and Environment Protection Co. Ltd., Beijing,*  
14 *100070, China*

15

16

17

18

---

\* Corresponding authors:

E-mail addresses: [20200004@nuc.edu.cn](mailto:20200004@nuc.edu.cn) (Z.P. Wang); [songj@nuc.edu.cn](mailto:songj@nuc.edu.cn) (J. Song);

[huangguiqiu@bbgu.edu.cn](mailto:huangguiqiu@bbgu.edu.cn) (G.Q. Huang).

<sup>1</sup> These authors contributed equally in this work.

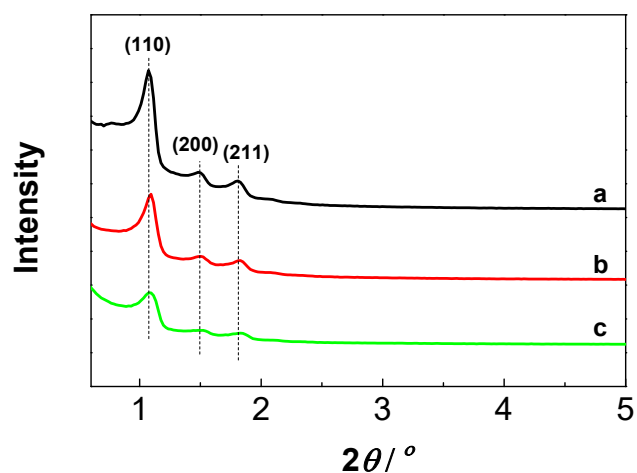

1

2 Fig. S1. Small-angle XRD patterns of Pt/CMC-600 samples prepared at H<sub>2</sub> reduction

3 temperature of 100 °C (a), 300 °C (b) and 400 °C (c).

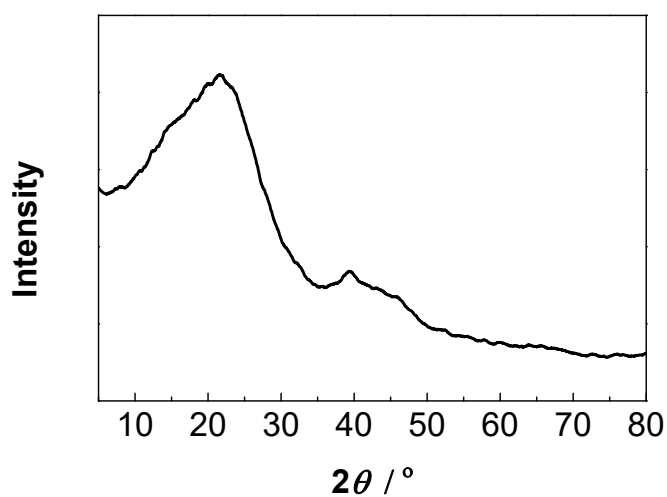

4

5

Fig. S2. Wide-angle XRD pattern of Pt/CMC-600 sample.

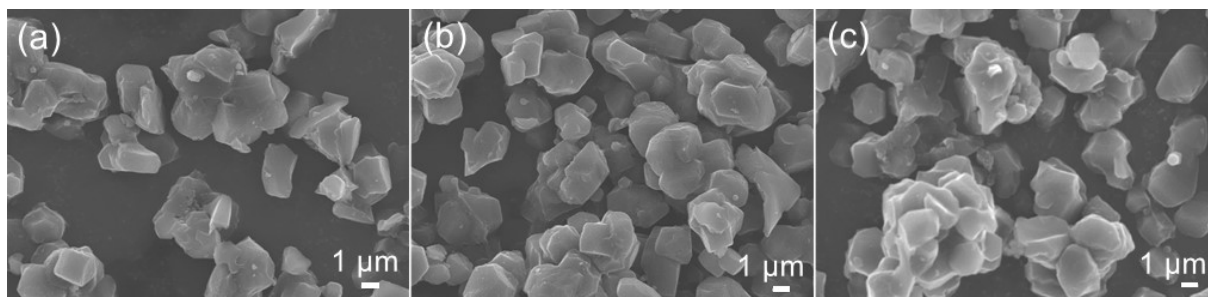

6

7 Fig. S3. SEM images of Pt/CMC-600 samples prepared at H<sub>2</sub> reduction temperature of 100 °C

8 (a), 300 °C (b) and 400 °C (c).

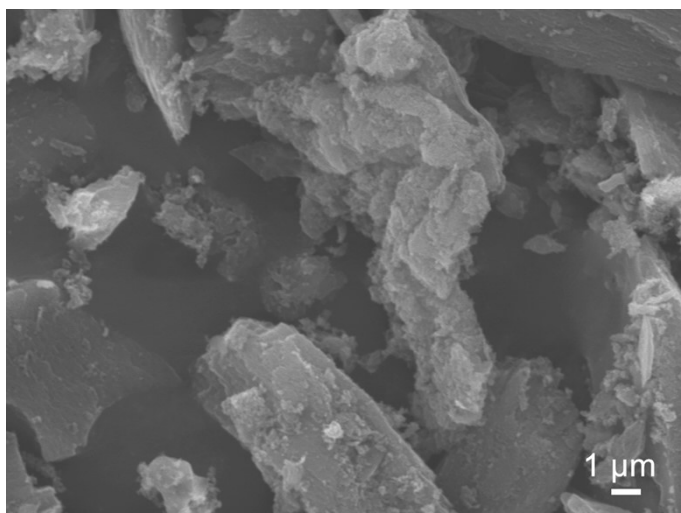

1

2

Fig. S4. SEM image of Pt/AC sample.

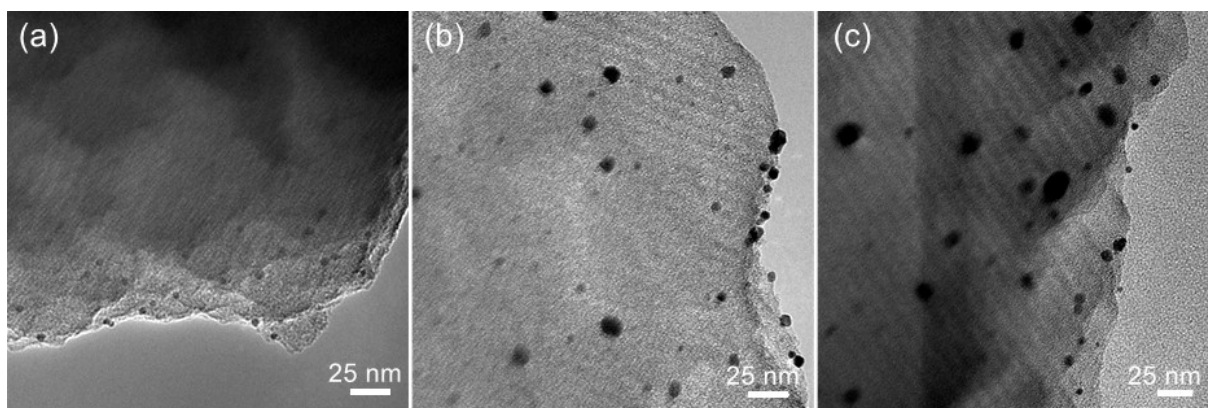

3

4 Fig. S5. TEM images of Pt/CMC-600 samples prepared at H<sub>2</sub> reduction temperature of 100 °C

5 (a), 300 °C (b) and 400 °C (c).

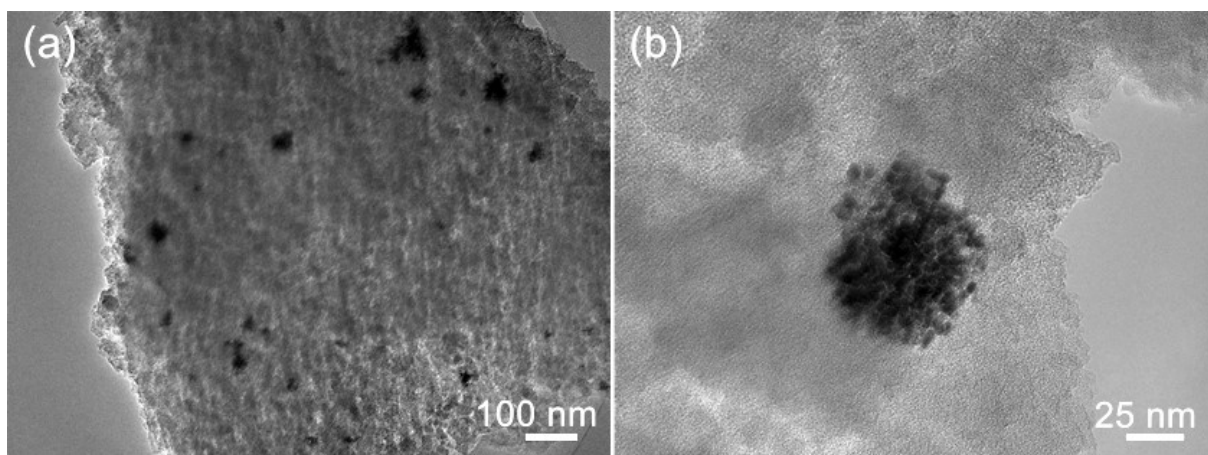

6

7

Fig. S6. TEM images of Pt/AC sample.

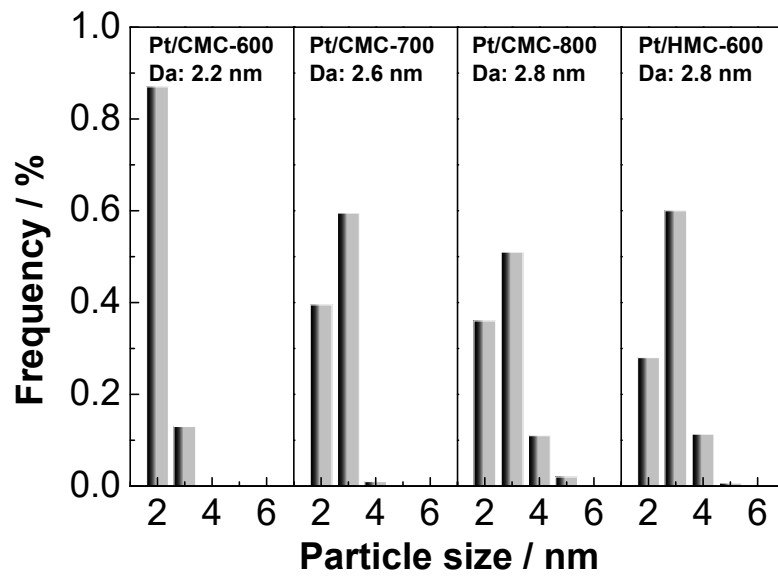

1

2 Fig. S7. Pt nanoparticle size distributions of Pt/CMC-T (T = 600, 700 and 800 °C) and Pt/HMC-  
 3 600 samples.

4

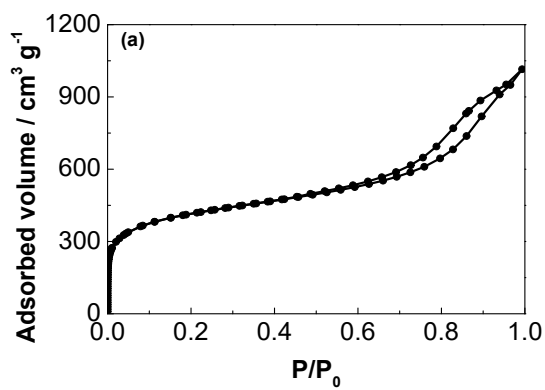

5

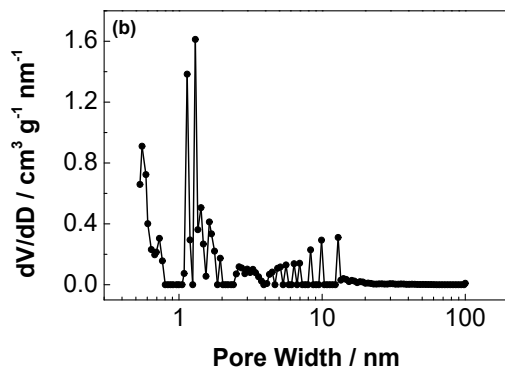

6

7 Fig. S8. N<sub>2</sub> adsorption-desorption isotherm (a) and the corresponding PSD (b) of Pt/AC sample.

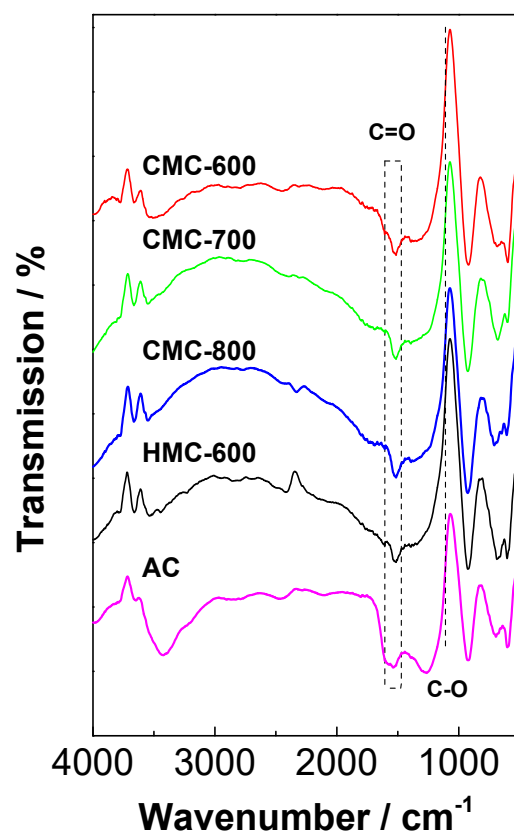

1  
2  
3

Fig. S9. The FT-IR spectra of various carbon materials.

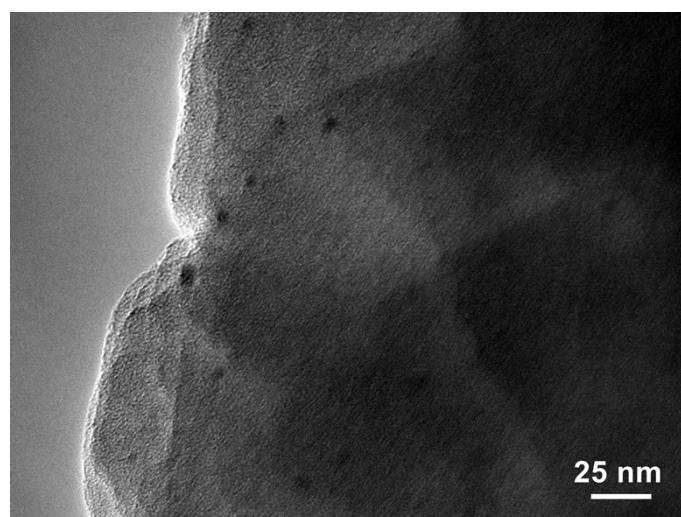

4  
5  
6  
7

Fig. S10. TEM image of the used Pt/CMC-600 sample.

1 Table S1. The physicochemical properties of CMC-T, HMC-600 and AC carriers.

| Sample  | $S_{\text{BET}}$<br>( $\text{m}^2 \text{g}^{-1}$ ) <sup>a</sup> | $V_t$<br>( $\text{cm}^3 \text{g}^{-1}$ ) <sup>b</sup> | $D_p$<br>(nm) <sup>c</sup> | $O_b$<br>(wt%) <sup>d</sup> | $O_s$<br>(wt%) <sup>e</sup> | $R_{\text{C=O/C-O}}$ <sup>f</sup> |
|---------|-----------------------------------------------------------------|-------------------------------------------------------|----------------------------|-----------------------------|-----------------------------|-----------------------------------|
| CMC-600 | 489                                                             | 0.29                                                  | 2.4                        | 6.5                         | 5.7                         | 1.2                               |
| CMC-700 | 476                                                             | 0.28                                                  | 2.4                        | 4.1                         | 3.5                         | 0.9                               |
| CMC-800 | 520                                                             | 0.29                                                  | 2.1                        | 3.9                         | 3.1                         | 0.6                               |
| HMC-600 | 504                                                             | 0.22                                                  | 2.9                        | 6.7                         | 5.5                         | 1.0                               |
| AC      | 1406                                                            | 1.58                                                  | 1.3                        | 3.6                         | 2.3                         | 0.7                               |

2 <sup>a</sup> $S_{\text{BET}}$ : BET specific surface area. <sup>b</sup> $V_t$ : total pore volume. <sup>c</sup> $D_p$ : the maximum value of the PSD. <sup>d</sup> $O_b$ : bulk oxygen  
3 content from elemental analysis. <sup>e</sup> $O_s$ : surface oxygen content from XPS. <sup>f</sup> $R_{\text{C=O/C-O}}$ : the peak area ratio of C=O to  
4 C-O from XPS.

5

6

7

8

9

10

11

12

13

14

15

16

17

18

1 Table S2. Performance comparisons of reported Pt-based catalysts for chloronitrobenzene  
 2 hydrogenation under given reaction conditions.

| Catalyst                          | Reaction conditions                     | Conv. / % | Sel. / % | Ref.      |
|-----------------------------------|-----------------------------------------|-----------|----------|-----------|
| Pt/CMC-600                        | 0.5 MPa H <sub>2</sub> , 60 °C, 60 min. | 100       | 100      | This work |
| Pt/NOMC                           | 1.0 MPa H <sub>2</sub> , 25 °C, 30 min  | 100       | 99.5     | 1         |
| Pt/CMK-3-HQ                       | 2.0 MPa H <sub>2</sub> , 80 °C, 60 min  | 100       | 99.8     | 2         |
| Pt/AC                             | 2.0 MPa H <sub>2</sub> , 60 °C, 60 min  | 100       | 98.4     | 3         |
| Pt@PtC <sub>x</sub> /C            | 0.1 MPa H <sub>2</sub> , 80 °C, 60 min  | 100       | 99.8     | 4         |
| Pt/AC                             | 1.0 MPa H <sub>2</sub> , 30 °C, 40 min  | 37        | 84       | 5         |
| Pt/PU                             | 2.0 MPa H <sub>2</sub> , 50 °C, 120 min | 100       | 99.5     | 6         |
| Pt/C(Fe)                          | 1.0 MPa H <sub>2</sub> , 60 °C, 360 min | 100       | 99.4     | 7         |
| Pt/Fe <sub>2</sub> O <sub>3</sub> | 0.1 MPa H <sub>2</sub> , 60 °C, 180 min | 100       | 72       | 8         |
| Pt/Fe <sub>3</sub> O <sub>4</sub> | 2.0 MPa H <sub>2</sub> , 50 °C, 120 min | 100       | 99.4     | 9         |
| Pt-TiO <sub>2</sub>               | 1.0 MPa H <sub>2</sub> , 40 °C, 50 min  | 100       | 100      | 10        |

3 Conv. : chloronitrobenzene conversion; Sel. : target chloroaniline selectivity.

#### 4 Supplementary reference

- 5 [1] J. Liang, X. Zhang, L. Jing and H. Yang, *Chin. J. Catal.*, 2017, **38**, 1252-1260.
- 6 [2] Y. Sheng, X. Wang, Z. Xing, X. Chen, X. Zou and X. Lu, *ACS Sustain. Chem. Eng.*, 2019, **7**, 8908-  
 7 8916.
- 8 [3] J. Mao, X. Yan, H. Gu and L. Jiang, *Chin. J. Catal.*, 2009, **30**, 182-184.
- 9 [4] K. Li, R. Qin, K. Liu, W. Zhou, N. Liu, Y. Zhang, S. Liu, J. Chen, G. Fu and N. Zheng, *ACS Appl.*  
 10 *Mater. Interfaces*, 2021, **13**, 52193-52201.
- 11 [5] H. Chen, D. He, Q. He, P. Jiang, G. Zhou and W. Fu, *RSC Adv.*, 2017, **7**, 29143-29148.

- 1 [6] L. Hao, Y. Zhao, B. Yu, H. Zhang, H. Xu, J. Xu and Z. Liu, *J. Colloid Interface Sci.*, 2014, **424**, 44-48.
- 2 [7] X. Xu, X. Li, H. Gu, Z. Huang and X. Yan, *Appl. Catal., A*, 2012, **429**, 17-23.
- 3 [8] Y. Fang, H. Xiao, N. Sui and W. Y. William, *RSC Adv.*, 2014, **4**, 11788-11793.
- 4 [9] C. Lian, H. Liu, C. Xiao, W. Yang, K. Zhang, Y. Liu and Y. Wang, *Chem. Commun.*, 2012, **48**, 3124-  
5 3126.
- 6 [10] M. Duan, D. He, Y. Ding, J. Sun, P. Jiang and G. Zhou, *ChemistrySelect*, 2023, **8**, 202204430.
